# Supplementary material for: The role of interparticle heterogeneities in the selenization pathway of Cu–Zn–Sn–S nanoparticle thin films: a real-time study
Source: Royal Society of Chemistry journal article supplement (doi:10.1039/c5tc01139f), 2015-01-01
Supplement: c5tc01139f1.pdf [file c5tc01139f1.pdf]

## Supplementary Information

### The role of inter-particle heterogeneities in the selenization pathway of Cu-Zn-Sn-S nanoparticle thin films: A real-time study

N. J. Carter,<sup>a</sup> R. Mainz,<sup>b</sup> B. C. Walker,<sup>a</sup> C. J. Hages,<sup>a</sup> J. Just,<sup>b</sup> M. Klaus,<sup>b</sup> S. S. Schmidt,<sup>b</sup> A. Weber,<sup>b</sup> W.-C.  
D. Yang,<sup>c</sup> O. Zander,<sup>b</sup> E. A. Stach,<sup>d</sup> T. Unold,<sup>b</sup> and R. Agrawal<sup>\*a</sup>

<sup>a</sup> School of Chemical Engineering, Purdue University, West Lafayette, IN 47907 USA.

<sup>b</sup> Helmholtz-Zentrum Berlin für Materialien und Energie, Hahn-Meitner-Platz 1, 14109 Berlin, Germany.

<sup>c</sup> School of Materials Engineering, Purdue University, West Lafayette, IN 47907 USA.

<sup>d</sup> Center for Functional Nanomaterials, Brookhaven National Laboratory, Upton, NY 11973 USA.

\* Corresponding E-mail: agrawalr@purdue.edu

**Table S1.** Peak locations for fluorescence and diffraction signals in the EDXRD spectra presented in Figures 1 and 2 in the main text and S1 and S2 in this Supplementary Information. The two peaks observed at 8.6 keV and 9.7 keV for all samples in Figures S1 and S2 are ghost peaks of the Mo-K $\beta$  peak, caused by the K and L absorption edges of the Ge in the detector, and thus are omitted from this table.

| Photon Energy (keV) | Type of Signal | Source of Signal                           |
|---------------------|----------------|--------------------------------------------|
| 11.1                | Fluorescence   | Se K $\alpha$                              |
| 12.4                | Fluorescence   | Se K $\beta$                               |
| 17.4                | Fluorescence   | Mo K $\alpha$                              |
| 19.6                | Fluorescence   | Mo K $\beta$                               |
| 22.4                | Diffraction    | CZTSe 101                                  |
| 25.2                | Fluorescence   | Sn K $\alpha$                              |
| 28.5                | Fluorescence   | Sn K $\beta$                               |
| 33.7                | Diffraction    | CuSe 101                                   |
| 34.3                | Diffraction    | Cu <sub>2-<math>\delta</math></sub> Se 111 |
| 34.8                | Diffraction    | CZTSe 112                                  |
| 35.7                | Diffraction    | CuSe 102                                   |
| 36.6                | Diffraction    | CZTS 112                                   |
| 39.7                | Diffraction    | CuSe 006                                   |
| 51.4                | Diffraction    | Mo 110                                     |
| 56.1                | Diffraction    | Cu <sub>2-<math>\delta</math></sub> Se 220 |
| 56.8                | Diffraction    | CZTSe 204                                  |
| 57.4                | Diffraction    | CuSe 110                                   |

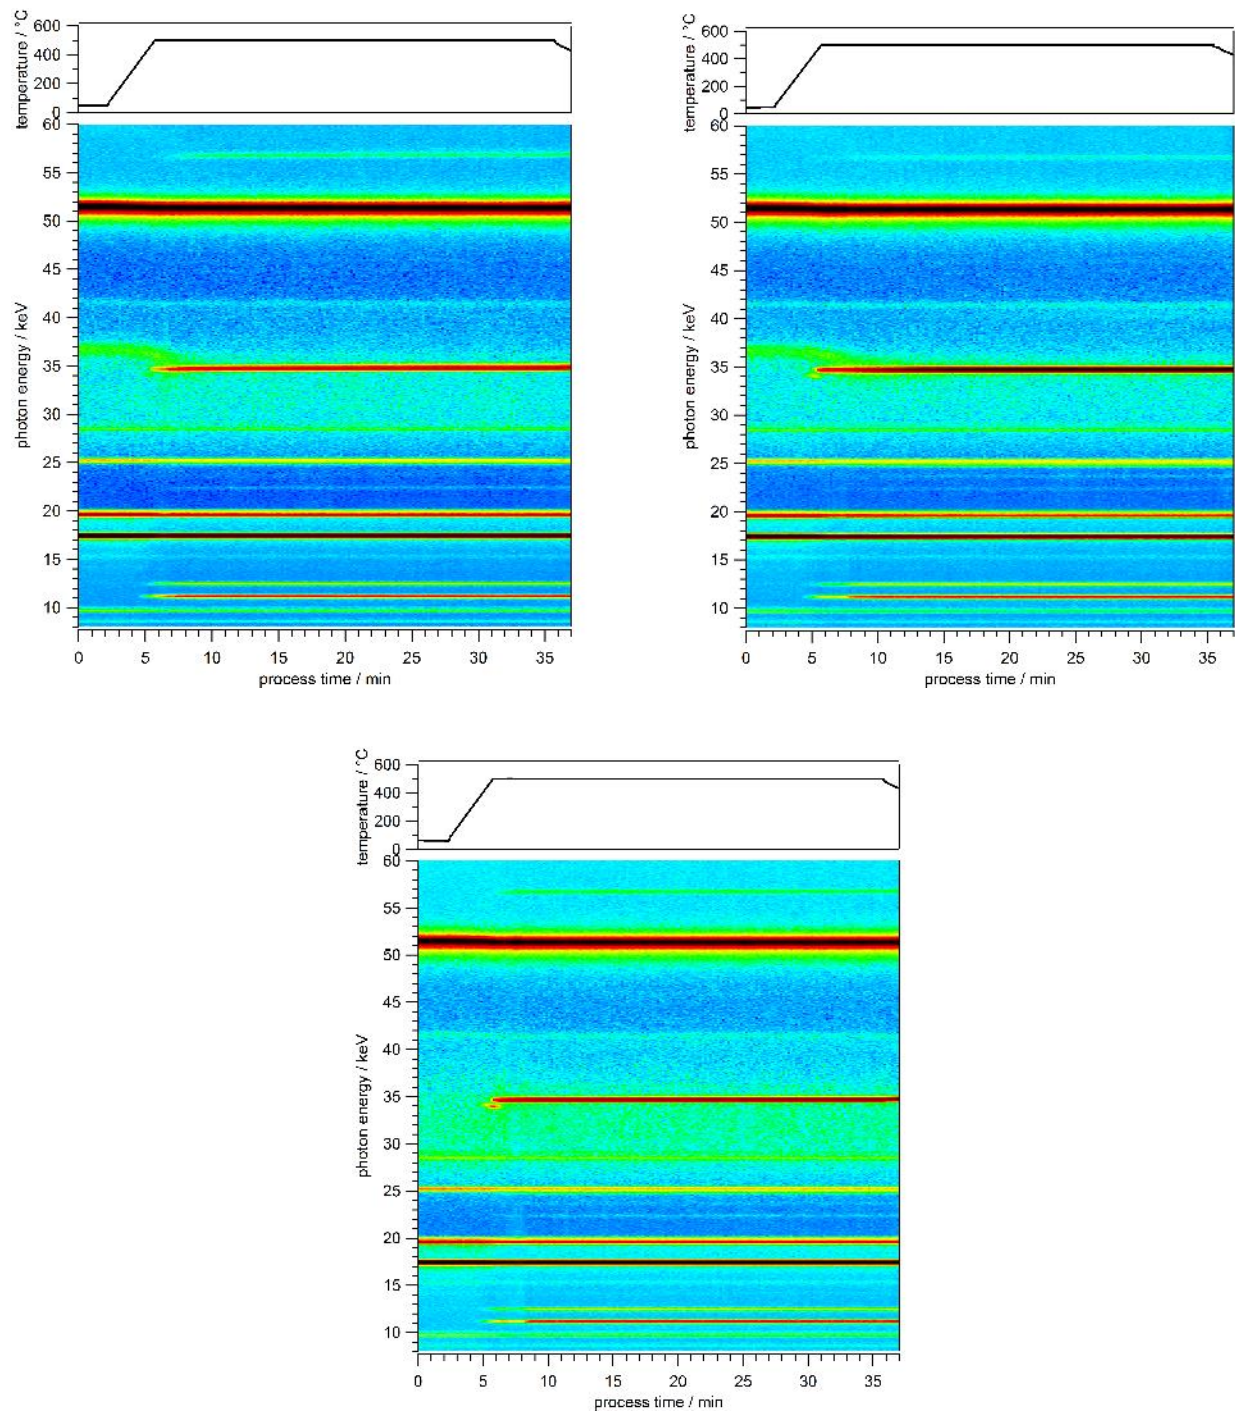

**Figure S1.** Full-range EDXRD data for fast heating of (a) large, (b) mixed, and (c) small particle films. See Table S1 for peak assignments.

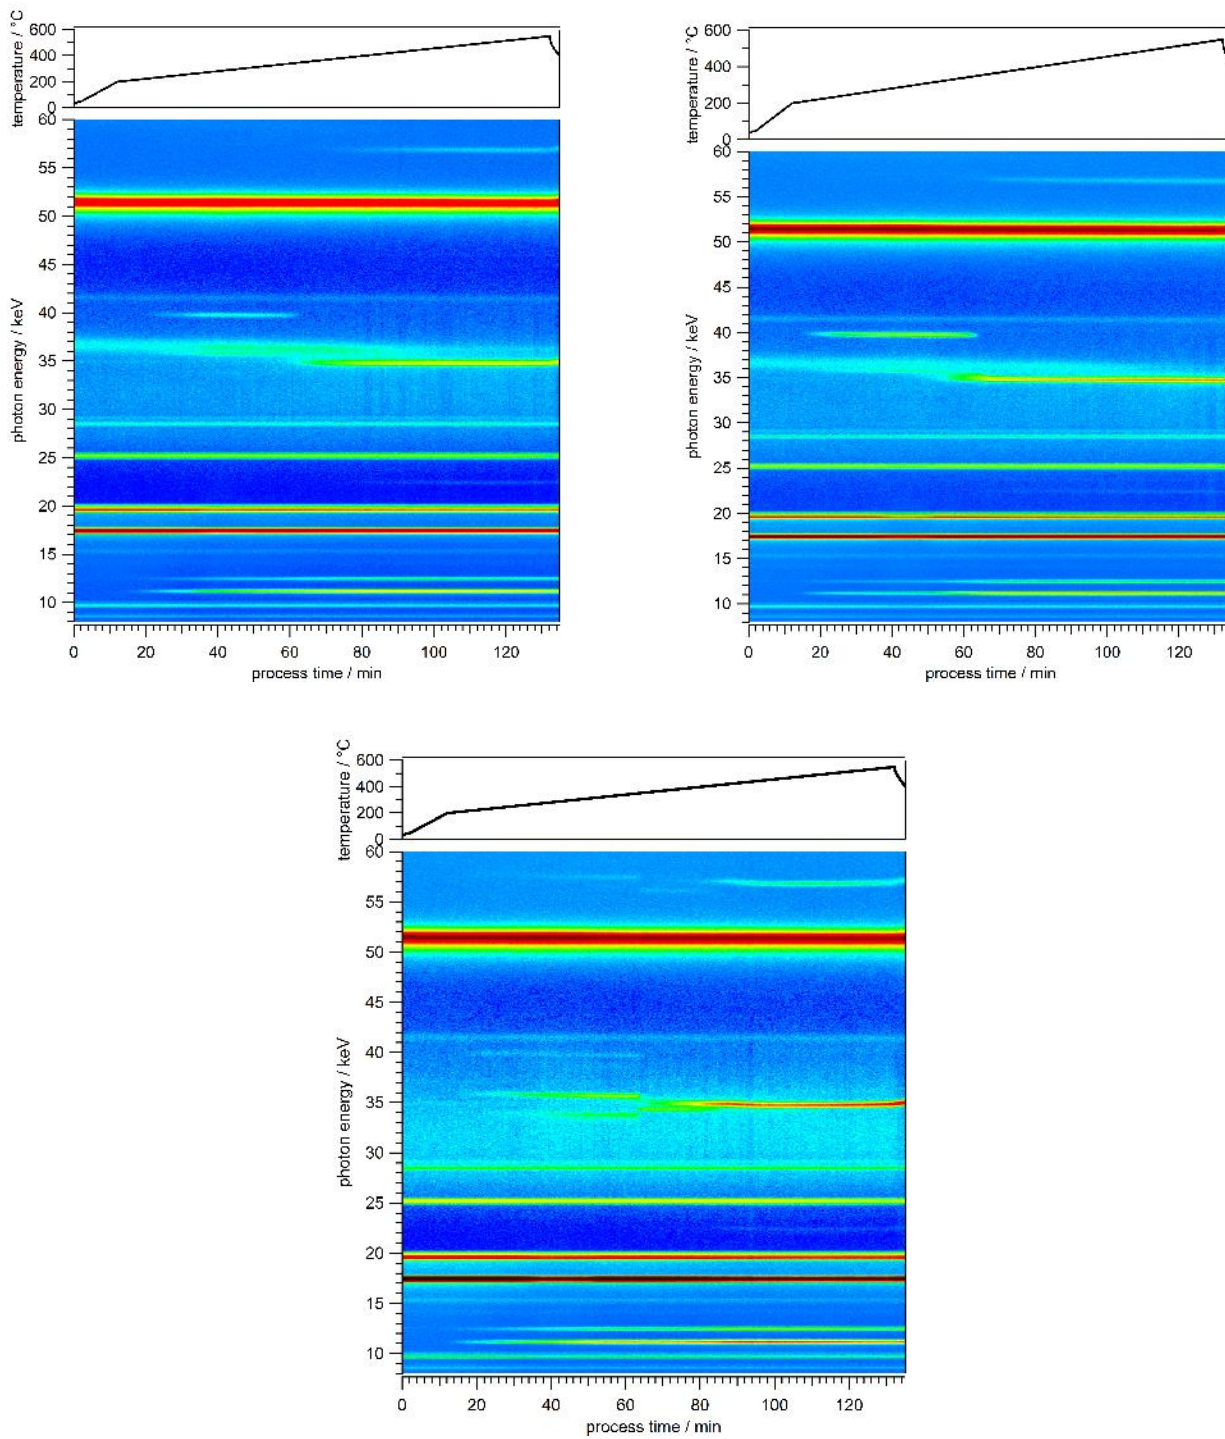

**Figure S2.** Full-range EDXRD data for slow heating of (a) large, (b) mixed, and (c) small particle films. See Table S1 for peak assignments.

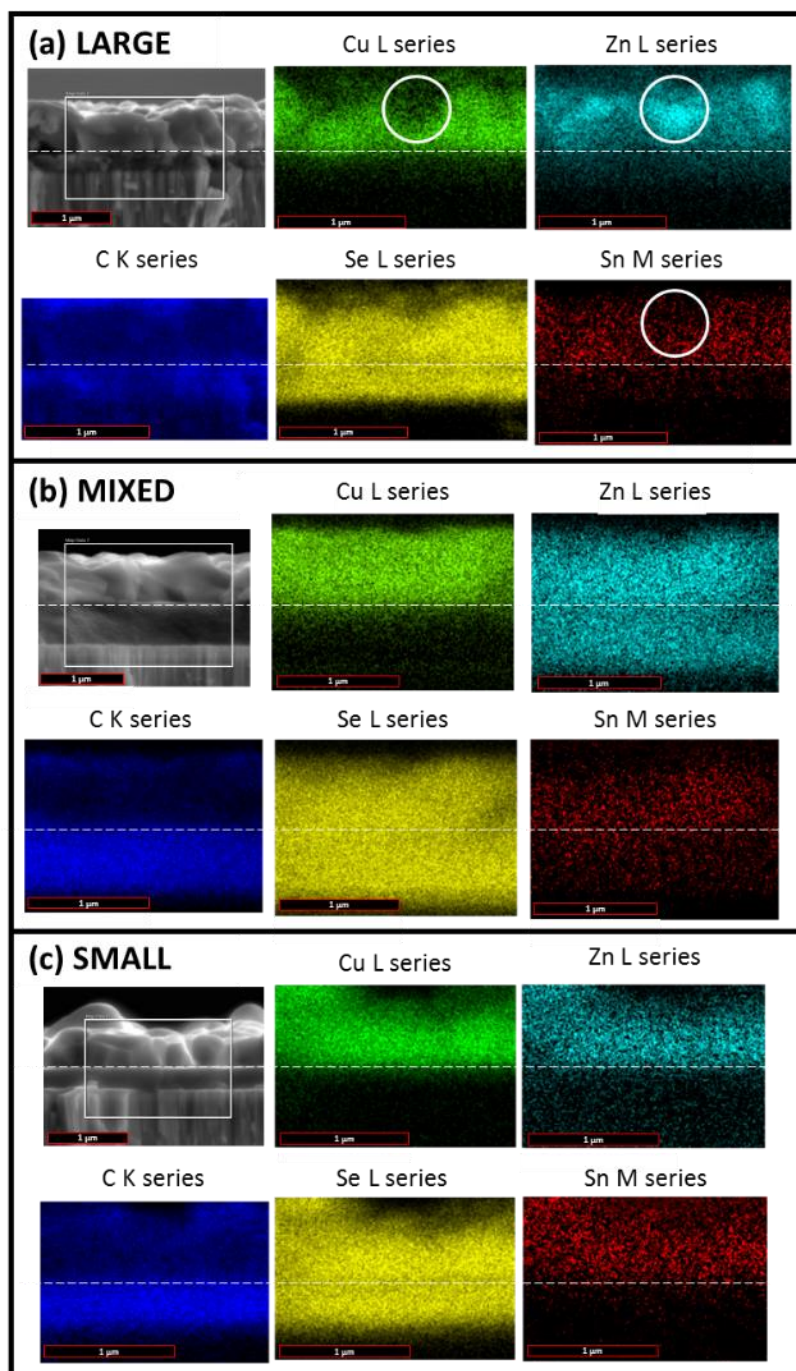

**Figure S3.** SEM-EDS compositional maps for cross sections of (a) large, (b) mixed, and (c) small precursor films after fast heating. The horizontal dashed lines represent the interface between the large-grain and fine-grain layers. The circles on the Cu, Zn, and Sn maps of the selenized large particle film demonstrated a segregated Zn-rich region.
